# Supplementary material
Source: publisher figshare collection journal article supplement (https://tandf.figshare.com/ndownloader/files/13512752)
Supplement: Supplementary file 1 [file 13512752]

**Supplementary File**

Table S1
*Zero-Order Correlations of Main Constructs in Study 1.*

| **Study 1 Correlations** | | | | | | | |
| --- | --- | --- | --- | --- | --- | --- | --- |
| **Variable** | **1** | **2** | **3** | **4** | **5** | **6** | **7** |
| 1. Enjoyment | — |  |  |  |  |  |  |
| 2. Mixed Affect | -.055 | — |  |  |  |  |  |
| 3. Ref. Present Self | .139* | .292*** | — |  |  |  |  |
| 4. Ref. Media Content | -.015 | .398*** | .494*** | — |  |  |  |
| 5. Ref. Past Self | .237*** | .131* | .108 | .018 | — |  |  |
| 6. Ref. Past Generations | -.058 | .361*** | .268*** | .277*** | .180** | — |  |
| 7. Self-Continuity | .154* | .217** | .281*** | .193*** | .609*** | .327*** | — |
| **Variable** | **1** | **2** | **3** | **4** | **5** | **6** | **7** |

*Note.* * *p* < .05, ** *p* < .01, *** *p* < .001.

Table S2
*Confirmatory Factor Analyses and Reliability Parameters for all Constructs Used in Study 1 and Study 2.*

|  | Chi² | df | RMSEA [CI] | SRMR | CFI | TLI | Cronbach's ALPHA | McDonald's OMEGA | AVE |
| --- | --- | --- | --- | --- | --- | --- | --- | --- | --- |
| Study 1 |  |  |  |  |  |  |  |  |  |
| Enjoyment* | 37.291 | 24 | .048 [.01, .08] | 0.030 | 0.991 | 0.987 | 0.85 | 0.86 | 0.71 |
| Positive affect* | 0.88 | 0.88 | 0.71 |
| Negative affect* | 0.93 | 0.93 | 0.82 |
| Reflection on the present self | 19.776 | 2 | .190 [.12, .27] | 0.039 | 0.953 | 0.858 | 0.83 | 0.83 | 0.55 |
| Reflection on the media content | 69.097 | 9 | .165 [.13, .20] | 0.042 | 0.928 | 0.881 | 0.89 | 0.90 | 0.60 |
| Reflection on the past self* | 37.517 | 24 | .048 [.01, .08] | 0.040 | 0.992 | 0.988 | 0.94 | 0.94 | 0.84 |
| Reflection on past generations* | 0.91 | 0.92 | 0.78 |
| Self-continuity* | 0.80 | 0.83 | 0.68 |
|  |  |  |  |  |  |  |  |  |  |
| Study 2 (N = 152) |  |  |  |  |  |  |  |  |  |
| Reflection on the present self | 103.447 | 27 | .136 [.11, .16] | 0.055 | 0.903 | 0.870 | 0.91 | 0.911 | 0.53 |
| Reflection on the media content | 31.347 | 9 | .128 [.081, .178] | 0.033 | 0.962 | 0.936 | 0.90 | 0.901 | 0.63 |
| Enjoyment* | 26.760 | 24 | .027 [.000, .073] | 0.027 | 0.998 | 0.998 | 0.97 | 0.968 | 0.91 |
| Nostalgia* | 0.98 | 0.985 | 0.96 |
| Self-continuity* | 0.66 | 0.725 | 0.66 |

*Note.* SRMR = Standardized Root Mean Square Residual; RMSEA = Root Mean Square Error of Approximation; CFI = Comparative Fit Index; TLI = Tucker-Lewis-Index; AVE = average variance extracted. As several scales contained only three items leading to a saturated model within respective CFAs, multifactorial CFAs with three scales each were conducted to overidentify the model. Scales in which this applies are marked with an asterisk in the table.

Table S3
*Used Media for Conditions With YouTube Links and Duration of Each Clip Respectively.*

| **Media Stimuli** | | **Link to Youtube-Video** | **Duration** |
| --- | --- | --- | --- |
| **Familiar Children’s Media** | |  |  |
|  | Maya the Honey Bee (1975) | https://www.youtube.com/watch?v=65FMs-eHKLA | 01:06 |
|  | Tom and Jerry (1960s) | https://www.youtube.com/watch?v=drpKa2BTGmE | 00:46 |
|  | The Flintstones (1960) | https://www.youtube.com/watch?v=sI0_XpTYZc0 | 00:36 |
|  | Duck Tales(1987) | https://www.youtube.com/watch?v=wHsqWOFry0w | 00:57 |
|  | Disney's Adventures of the Gummi Bears (1985) | https://www.youtube.com/watch?v=YO1GBsuzTWU | 01:01 |
|  | Pokémon (1997) | https://www.youtube.com/watch?v=oZvDIxFlMZ8 | 01:01 |
| **Unfamiliar Children’s Media** | |  |  |
|  | All Hail King Julien (2014) | https://www.youtube.com/watch?v=tbrl47_ctoc | 00:30 |
|  | Dinotrux (2014) | https://www.youtube.com/watch?v=zOpmSfG84Ko* | 00:34 |
|  | Dragons (2012) | https://www.youtube.com/watch?v=jQuuIlfhuu4* | 00:21 |
|  | H2O: Just Add Water (2007) | https://www.youtube.com/watch?v=bvoaD_NB1ic | 00:28 |
|  | Sally Bollywood: Super Detective (2009) | https://www.youtube.com/watch?v=q2IUm7eNOVY | 00:21 |
|  | The Deep (2015) | https://www.youtube.com/watch?v=Y8h005Bljlc* | 01:00[[1]](#footnote-1) |
|  | Wild Kratts (2011) | https://www.youtube.com/watch?v=wqx-nkazR2g | 00:45 |
|  | Zoom the White Dolphin (2015) | *Not available on YouTube* | 00:43 |
| **Eudaimonic Trailers** | |  |  |
|  | Amélie (2001) | https://www.youtube.com/watch?v=sQVgi8MBakk | 01:41 |
|  | Big Fish (2003) | https://www.youtube.com/watch?v=ouG6fVWwcbA | 01:04 |
|  | The Intouchables (2011) | https://www.youtube.com/watch?v=bkHjdcvvHXk | 02:14 |

*Note:* With an asterisk marked links refer to intros that are not available in the language as used in our study (German) on YouTube by the time of this paper’s submission. For all videos, we used the clean feed (without possible addition of comments or text created by the uploader).

Table S4
*List of German Items Used in Study 2.*

| **Variable label** | **Item** |
| --- | --- |
| nostalgia_1 | Ich fühle mich in diesem Moment nostalgisch |
| nostalgia_2 | Ich habe jetzt gerade nostalgische Gefühle |
| nostalgia_3 | Ich fühle mich nostalgisch im Moment |
| present_self_1 | Ich fühle mich gut, da das Video mir gezeigt hat, wie zufrieden ich mit mir und meinem Leben doch eigentlich sein kann |
| present_self_2 | Ich fühle mich gut, da ich nach der Videorezeption wieder erkennen kann, wie erfüllt und sinnvoll mein eigenes Leben ist |
| present_self_3 | Ich fühle mich gut, da das Video mir geholfen hat, mich selbst und mein Leben besser zu akzeptieren |
| present_self_4 | Ich fühle mich gut, da ich nach der Videorezeption das Gefühl habe, mein Leben im Griff zu haben |
| present_self_5 | Das Video hinterlässt bei mir positive Gefühle, weil mir bewusst geworden ist, wie sehr ich selbst über mein Leben bestimmen kann |
| present_self_6 | Es ist ein gutes Gefühl, zu erkennen, dass mein Leben anders als im Video nicht von den Nebenfiguren abhängt |
| present_self_7 | Ich habe ein gutes Gefühl, weil die Emotionen, die ich im Video verspürte, mich auf eine positive Weise herausgefordert haben |
| present_self_8 | Es hat mir gut getan, mich mit der Thematik des Videos auseinanderzusetzen |
| present_self_9 | Ich fühle mich gut, da mich das Video zum Nachdenken gebracht hat und ich mir so Gedanken über mich und mein Leben mache |
| refl_media_1 | Es war ein gutes Gefühl, während des Videos ganz bei den Geschehnissen der Hauptfigur(en) zu sein |
| refl_media_2 | Es fühlte sich gut und richtig an, während des Videos so viel Mitgefühl für die Hauptfigur(en) zu verspüren |
| refl_media_3 | Es hat mir gut getan, während des Videos mit der/den Hauptfigur(en) mitzufühlen |
| refl_media_4 | Gerade weil das Video sehr traurig und belastend war, hatte ich das Gefühl, dass das Video auf sehr glaubwürdige Art und Weise wichtige und zentrale Werte im Leben vermittelt |
| refl_media_5 | Insgesamt verspüre ich ein gutes Gefühl, da die Hauptfigur(en) im Video auf vorbildliche Art und Weise gehandelt hat |
| refl_media_6 | Es gibt mir ein gutes Gefühl zu sehen, wie vorbildlich die Hauptfigur(en) mit seiner/ihrer/ihren schwierigen Lebenssituation umgeht/umgehen |
| enjoyment_1 | Alles in allem fühlte ich mich gut unterhalten vom Video |
| enjoyment_2 | Insgesamt hat es Spaß gemacht, das Video zu schauen |
| enjoyment_3 | Alles in allem hat es mir Vergnügen bereitet, das Video zu sehen |
| selfcontinuity1 | Während ich die Inhalte angesehen habe, fühlte ich mich mit meiner Vergangenheit verbunden |
| selfcontinuity2 | Während ich die Inhalte angesehen habe, fühlte ich mich verbunden mit der Person, die ich einmal war |
| selfcontinuity3 | Wichtige Persönlichkeitsmerkmale bleiben über die Zeit hinweg gleich |

Table S5
*Zero-Order Correlations of Main Constructs in Study 2.*

| **Study 2 Correlations** | | | | | |
| --- | --- | --- | --- | --- | --- |
|  | **1** | **2** | **3** | **4** | **5** |
| 1. Nostalgia  (*M* = 3.29, *SD* = 1.50) | — | .747** | .355** | .279** | .464** |
| 2. Self-Continuity  (*M* = 2.83, *SD* = 1.21) |  | — | .358** | .270** | .384** |
| 3. Reflection on Present Self  (*M* = 2.91, *SD* = 1.15) |  |  | — | .793** | .530** |
| 4. Reflection on Media Content  (*M* = 3.33, *SD* = 1.39) |  |  |  | — | .548** |
| 5. Enjoyment  (*M* = 4.94, *SD* = 1.62) |  |  |  |  | — |

*Note.* * *p* < .05, ** *p* < .01, *** *p* < .001.

1. The German version of the intro was only 00:29. [↑](#footnote-ref-1)
